# Supplementary figures and images for: Drug prescription rates in secondary cardiovascular prevention in old age: Do vulnerability and severity of the history of cardiovascular disease matter?
Source: PubMed Central journal article supplement — Scand J Prim Health Care. 2015 Dec 10;33(4):260–8. doi: 10.3109/02813432.2015.1117281 (PMC4750735; doi:10.3109/02813432.2015.1117281), 2015-12-10

**Additional online file: Flow chart of participants in the study**

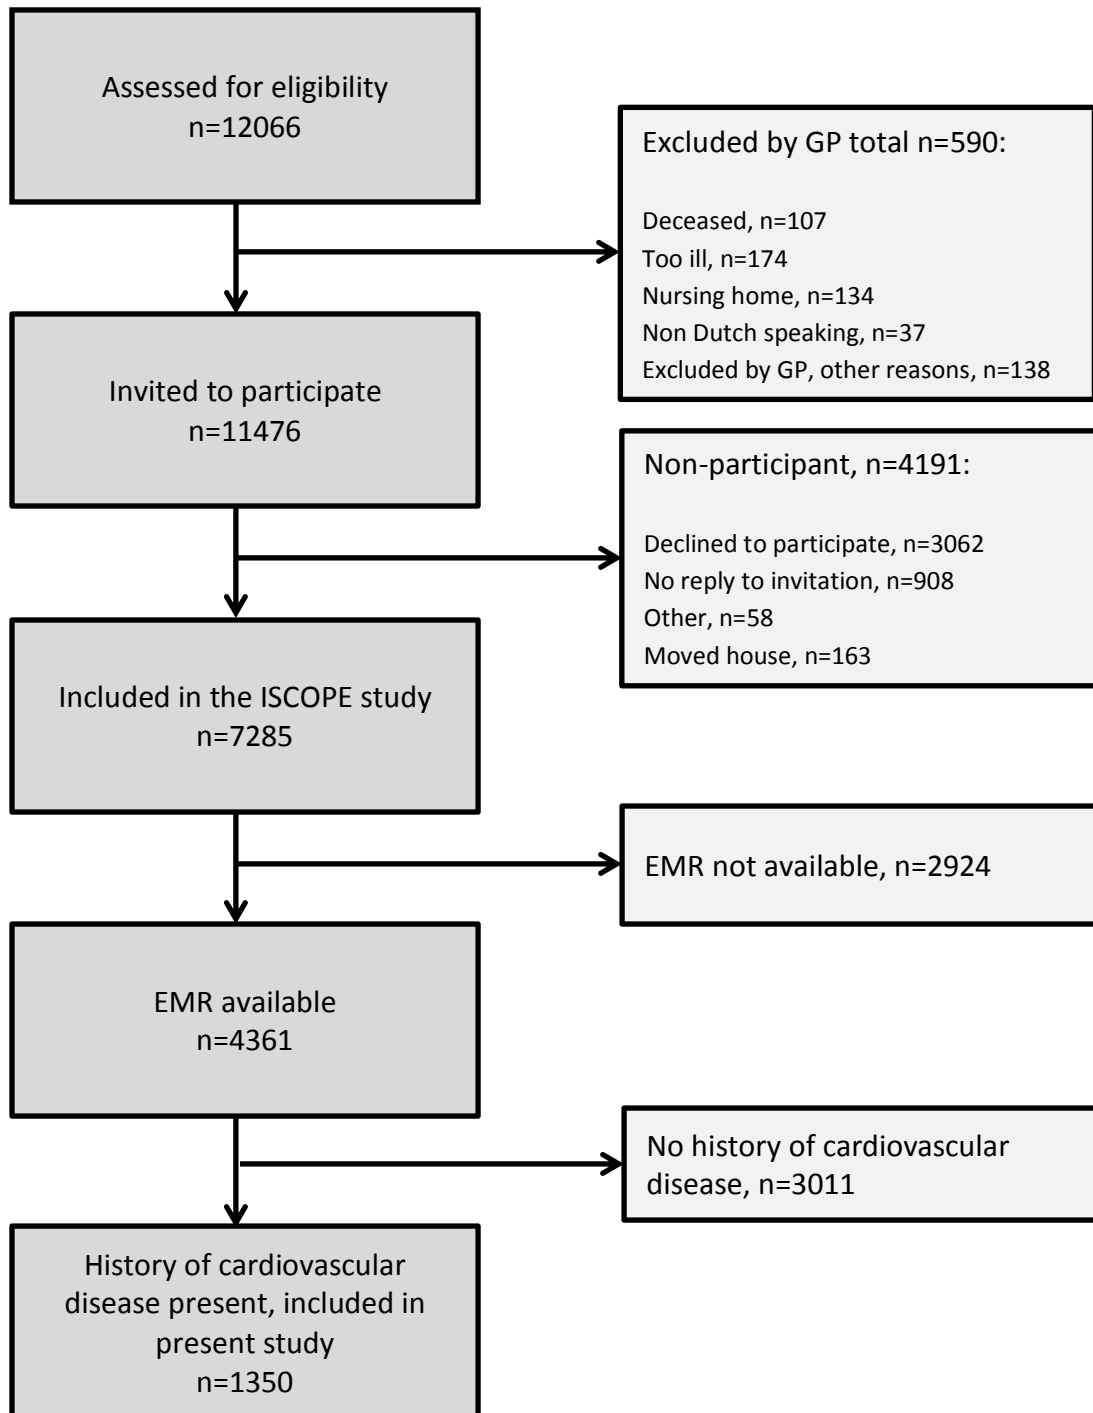

Supplement: ipri-33-260S1.pdf [file ipri-33-260S1.pdf]
